# Supplementary material for: Effects of wheat stubble on runoff, infiltration, and erosion of farmland in the Loess Plateau, China subjected to simulated rainfall
Source: Copernicus journal article supplement (doi:10.5194/se-2016-163), 2016-12-07
Supplement: Supplementary file [file se-2016-163-AC2-supplement.pdf]

1

2 **Response to SE-2016-163-SC1**

3 Thanks for your suggestions. We are appreciate for the comments concerning our manuscript entitled  
4 "Effects of wheat stubble on runoff, infiltration, and erosion of farmland in the Loess Plateau, China  
5 subjected to simulated rainfall" (ID: SE-2016-163). We have studied comments carefully and have made  
6 correction. The main corrections in the paper according to the reviewer's comments are as follows:

7 1. Line 27 and Line 147: "sloping farmland" change to "sloped farmland"

8 Reponse: Line 30: Soil and water losses from agricultural land, particularly **sloped farmland**, are  
9 regarded as major environmental threats to ecosystem sustainability on the Loess Plateau, China.

10 Line 153-154: TP is typically used by local farmers on **the sloped farmland** in the Loess Plateau region.

11 2. Line 257-259: ""Vermang et al. (2015) found that..." should be deleted.

12 Response: this sentence has been deleted in the manuscript.

13 3. Line 264 this sentence should add some references.

14 Response: To address this problem, the Chinese government launched the "Grain-for-Green" project in  
15 1999 with the aim of converting steep sloping ( $>25^\circ$ ) farmland into forest or grassland (**Cao et al., 2009;**  
16 **Wang, 2015**).

17 4. Line459 In the figure title "runoff pots" should be "runoff plots"

18 Response: Line 479: Figure 1 Experimental **runoff plots (a)** and schematic of the rainfall simulator (b).

19 5. In the figure2-5, I suggest use colors in these figures and the data symbols should increase the size:

20 Response: the figures have been reset according to the suggestions as follows:

21

22

23

24

25

26

27

28

29

30

31

32

33

34

35

36

37

38

39

40

41 Figure 2 Dynamics of the runoff rate in WS and TP plot during the simulated rainfall event .

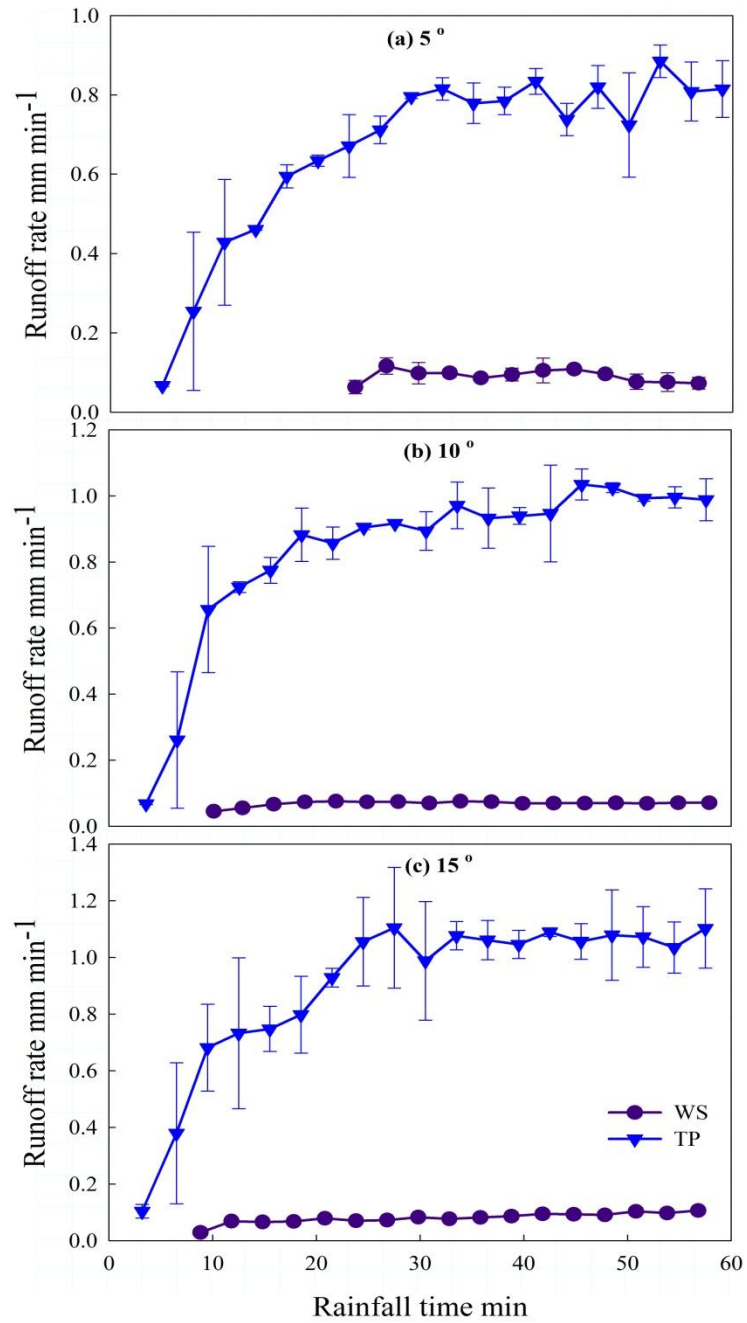

42

43

44

45 Figure 3 Dynamics of the infiltration rate in WS and TP plot during the simulated rainfall event.

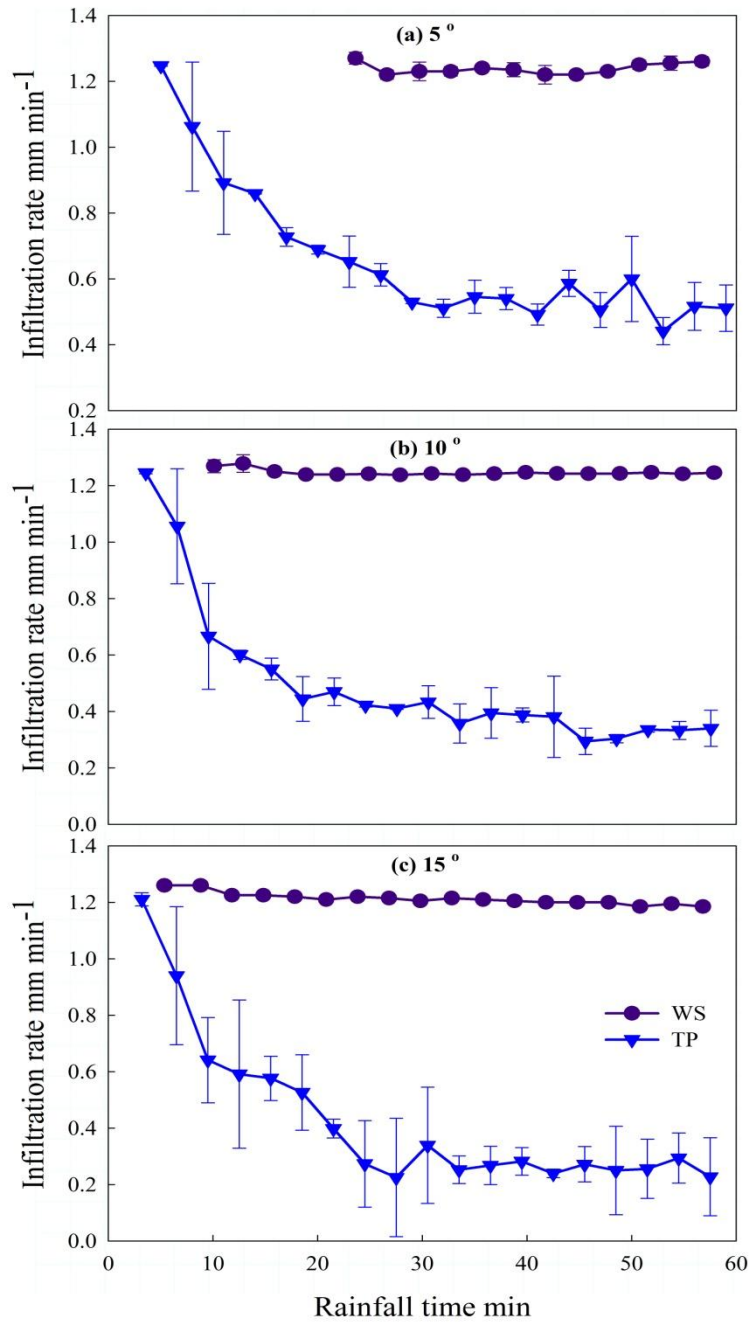

46

47

48 Figure 4 Dynamics of the Sc in WS and TP plot during the simulated rainfall event.

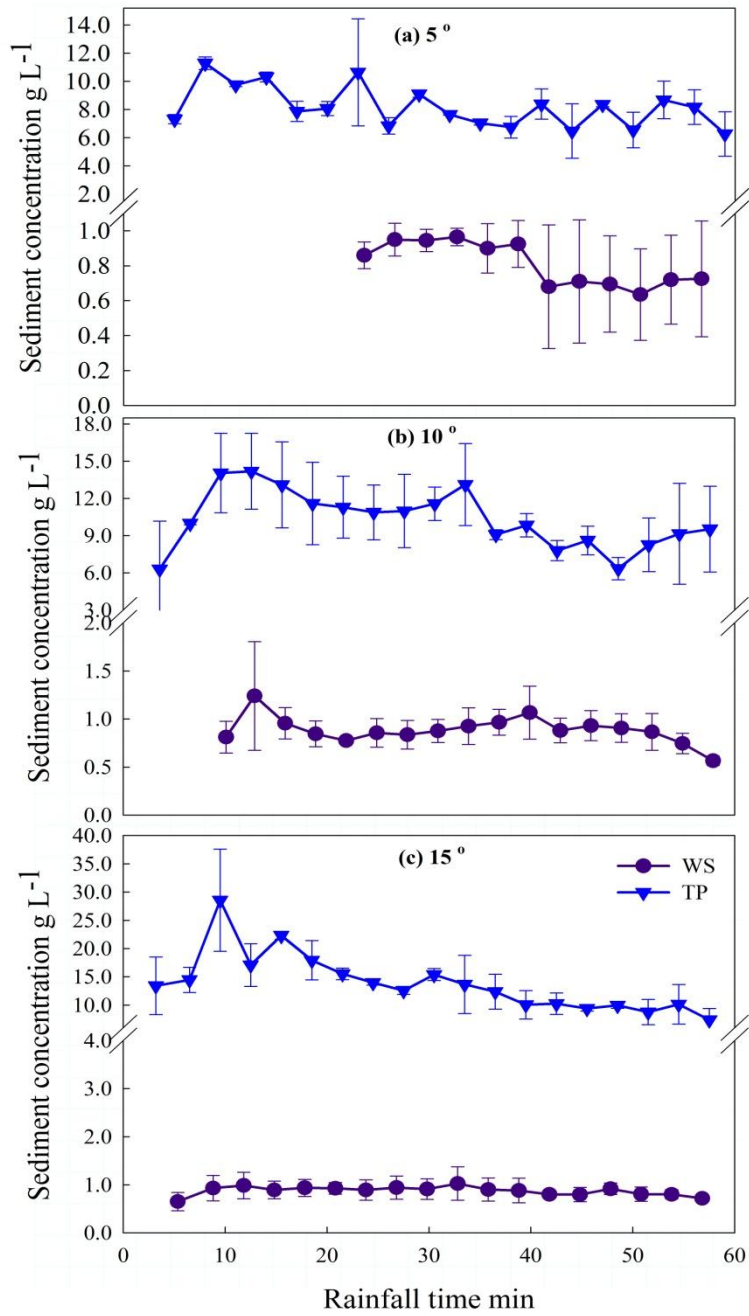

49

50

51 Figure 5 Runoff rates versus sediment concentrations for WS and TP management treatment.

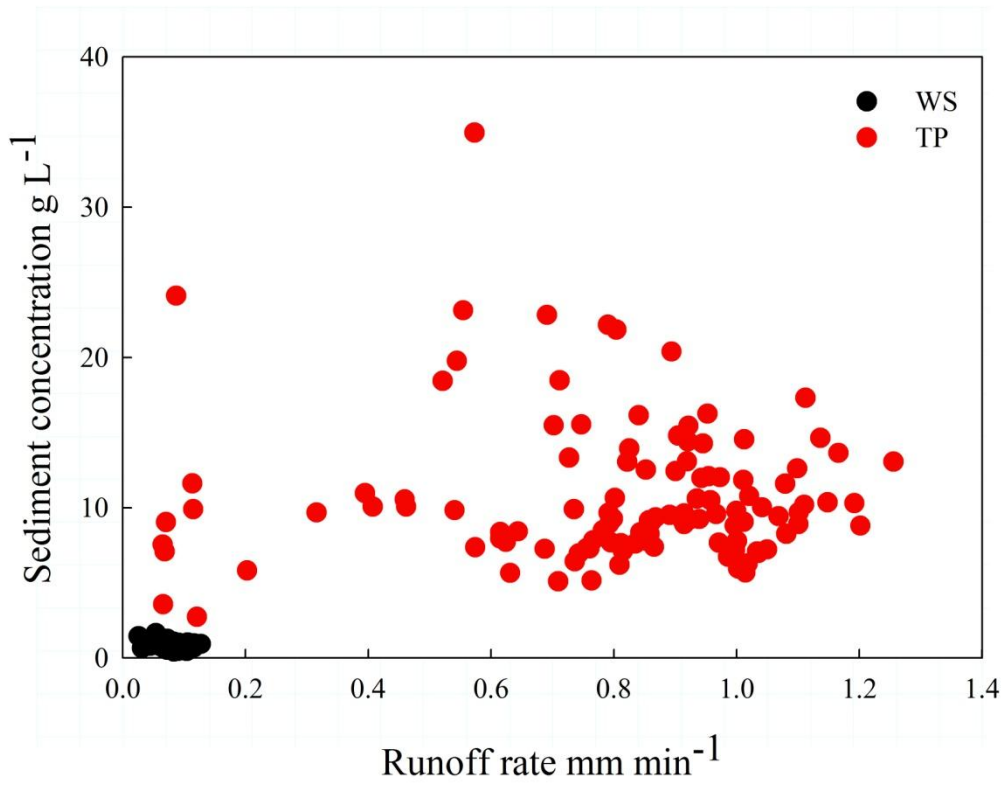

52

53

54

55
